# Supplementary material for: Effect of Abscisic Acid (ABA) Combined with Two Different Beekeeping Nutritional Strategies to Confront Overwintering: Studies on Honey Bees’ Population Dynamics and Nosemosis
Source: PubMed Central journal article supplement (PMC6835648; doi:10.3390/insects10100329), 2019-10-01
Supplement: insects-10-00329-s001.pdf [file insects-10-00329-s001.pdf]

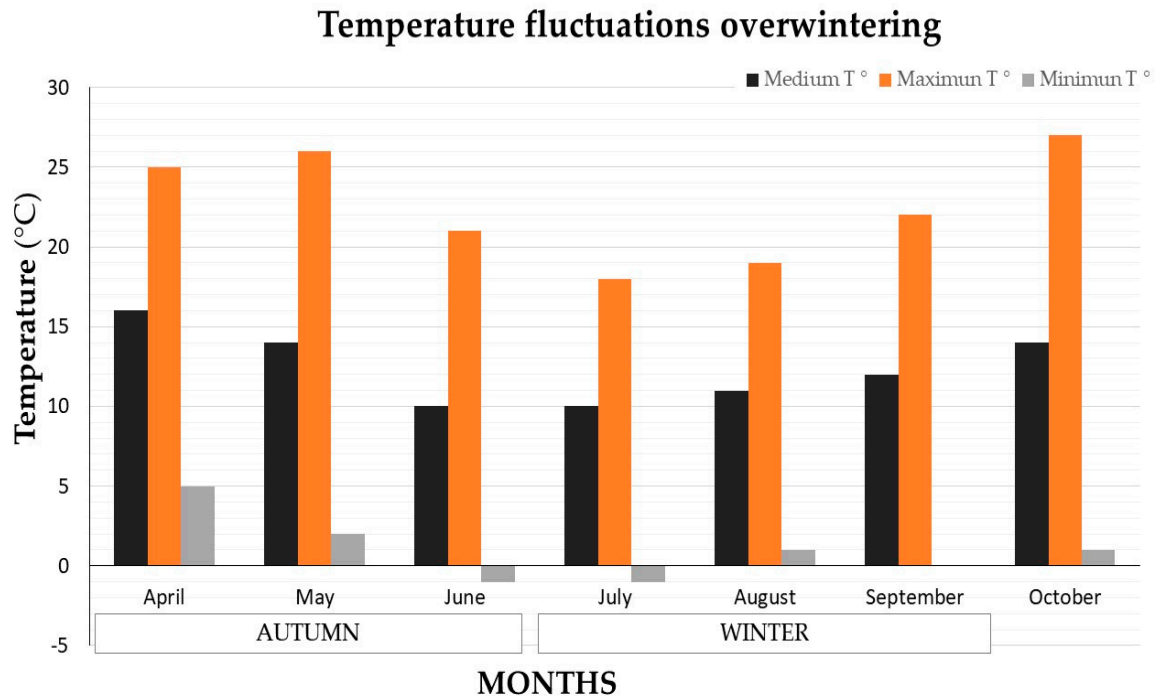

**Fig. S1. Temperature fluctuations during field experiment (autumn-winter, year 2017).** Average temperatures for each month: black bars. Maximum temperature registered each month: brown bars. Minimum temperature registered each month: grey bars.

## Oral toxicity to adult honey bees

### Methodology

We tested for oral toxicity by adding different concentrations of ABA (FandaChem, CAS N° 21293-29-8, [www.fandachem.com](http://www.fandachem.com), 90% purity) to the food of worker bees. Twenty-five (25) newly emerged bees were confined in each 15×15×3 cm acrylic box. Each unit was provided with one water feeder and a separate food feeder. Substance doses were incorporated into a powdered sugar and glucose mixture (candy) and supplied *ad libitum* to bees. The concentrations tested were 10  $\mu$ M, 50  $\mu$ M and 500  $\mu$ M of ABA. Nurse bees were maintained under short-term consumption of the different concentration of ABA during 9 successive days. The control was carried out by feeding bees with plain candy (no added ABA.) Each treatment and the control were tested per triplicate ( $\times 3$ ). The food was supplied daily and consumption was recorded simultaneously. Using a removable device, the food mass was measured and the amount consumed was divided by the number of live bees.

### Statistical analysis

Survival curves (number of live bees versus time for each treatment) were performed by the Kaplan-Meier method (Kaplan and Meier 1958). The non-parametric Log-Rank test was performed to determine differences between survival curves.

## Result

The results obtained show that the mortality of bees increases as a function of time for the control group and all tested ABA concentrations. The multiple comparisons by the Log-Rank method between the curves obtained did not show significant differences with respect to the control ( $\chi^2 = 1.434$ ;  $df = 3$ ;  $p = 0.698$ ).

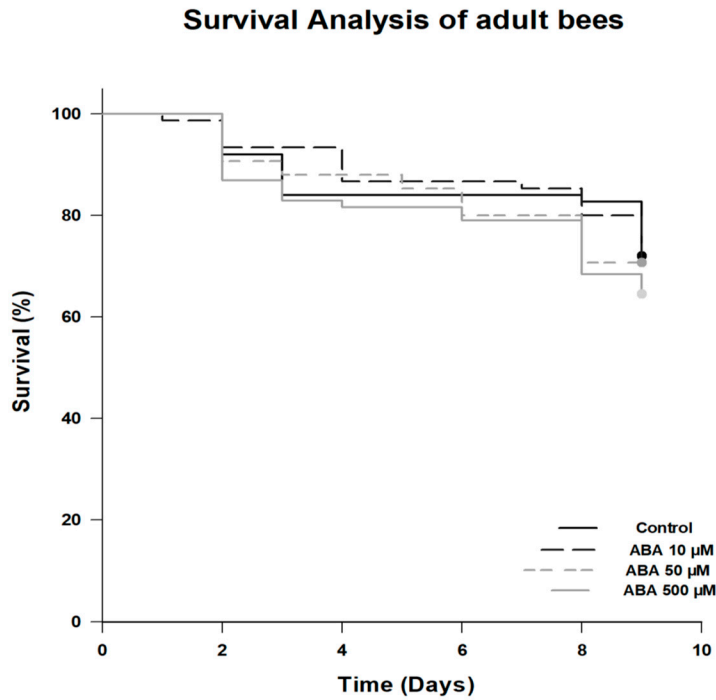

**Figure S2. Kaplan-Meier plot for adult honey bee survival.** Survival of adult honey bees fed *ad libitum* during 9 days: control (powdered sugar and glucose), ABA 10 µM; ABA 50 µM and ABA 500 µM). In all treatments the curves obtained did not show significant differences with respect to the control (Longrank test,  $\chi^2 = 1.434$ ;  $df = 3$ ;  $p = 0.698$ )
